# Supplementary material for: Betel Nut Arecoline Induces Different Phases of Growth Arrest between Normal and Cancerous Prostate Cells through the Reactive Oxygen Species Pathway
Source: PubMed Central journal article supplement (PMC7729937; doi:10.3390/ijms21239219), 2020-12-03

# (A) RWPE-1

## 24 h

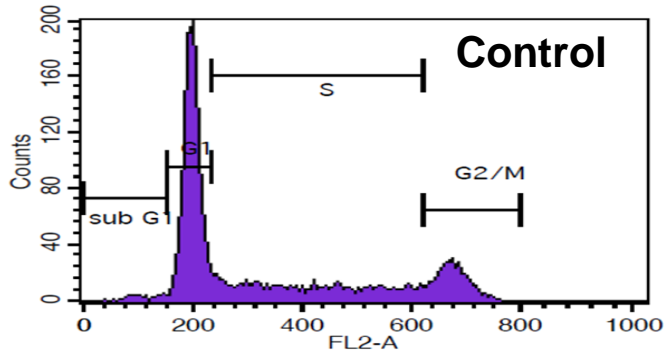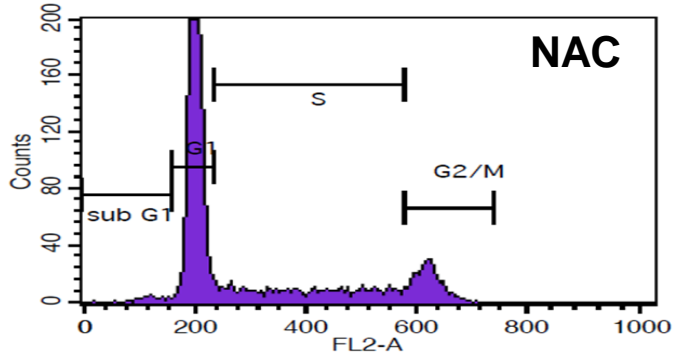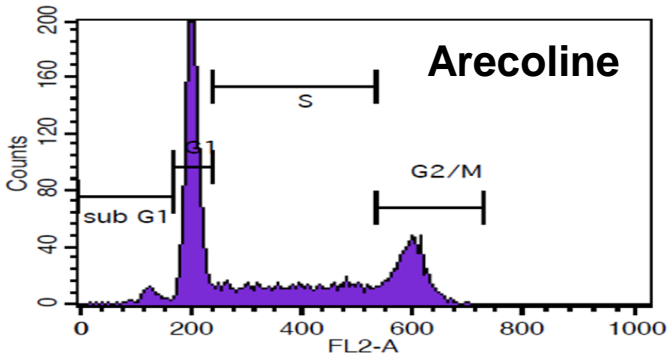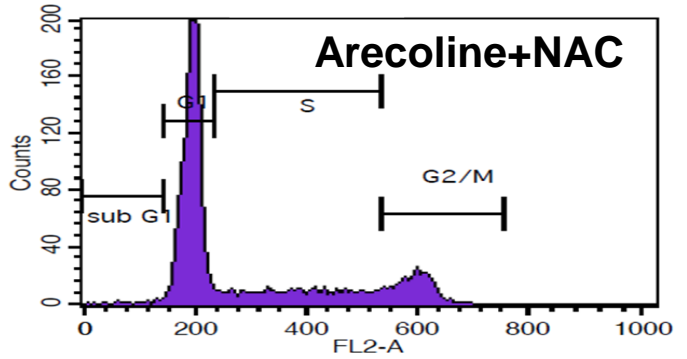

## 48 h

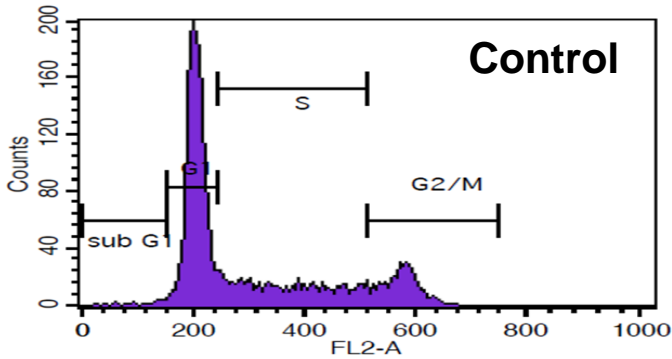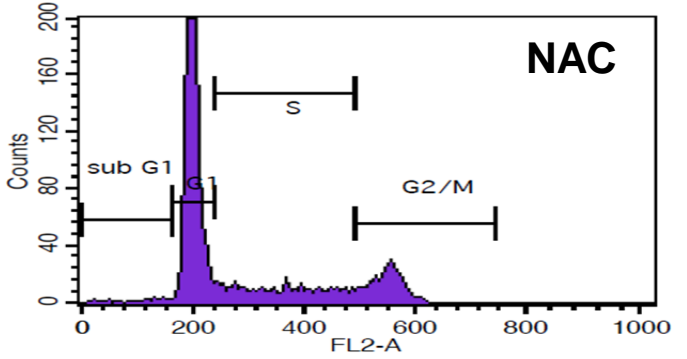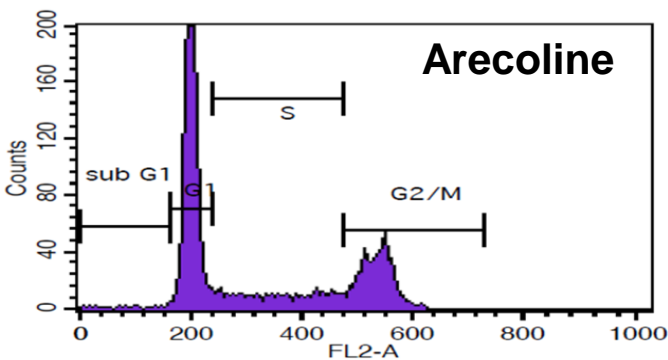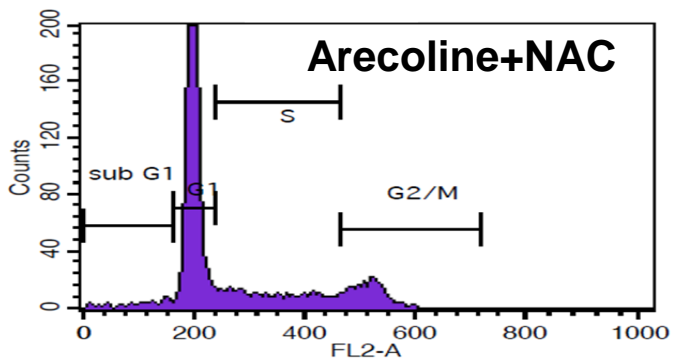

# (B) PC-3

## 24 h

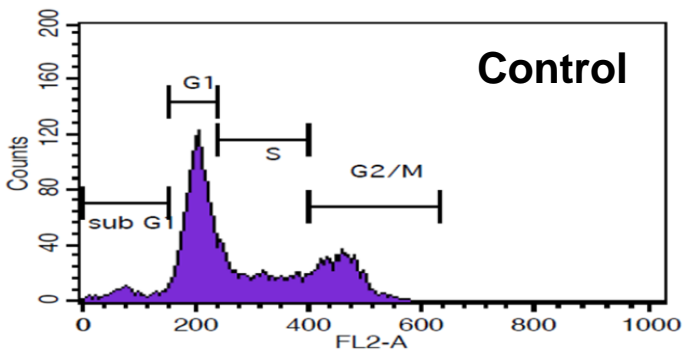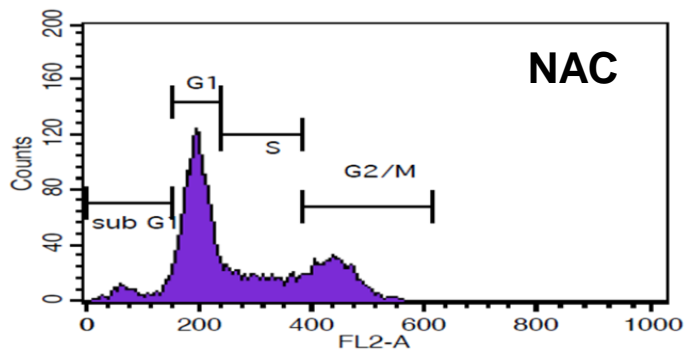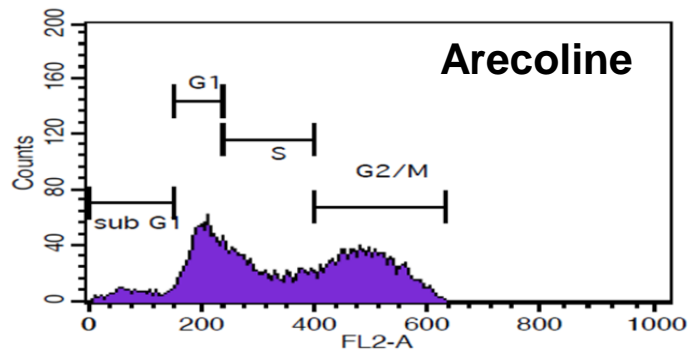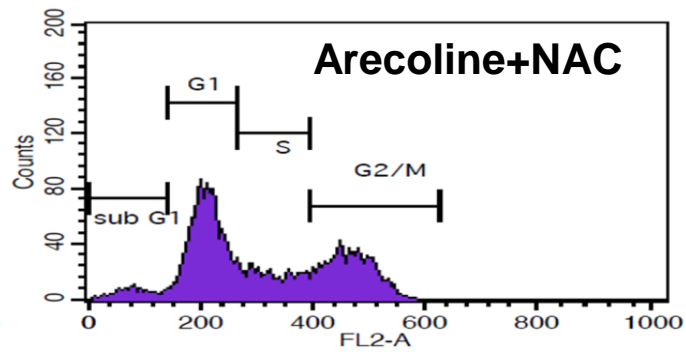

## 48 h

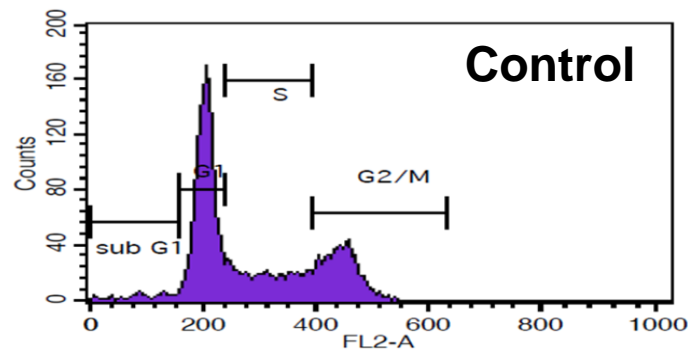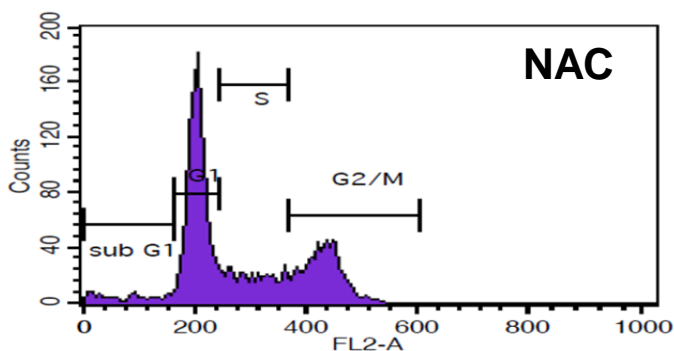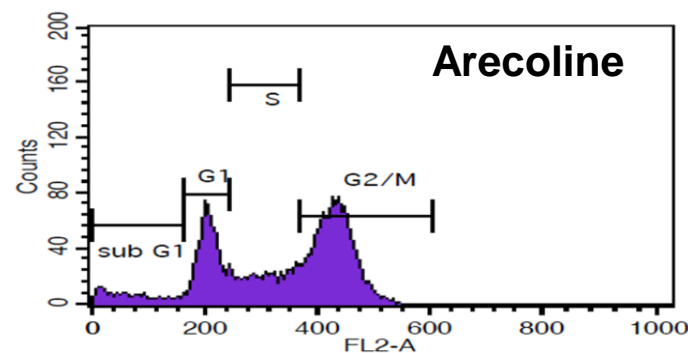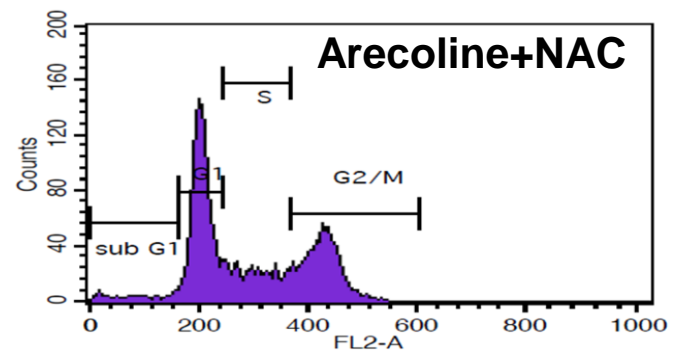

# (C) LNCaP

## 24 h

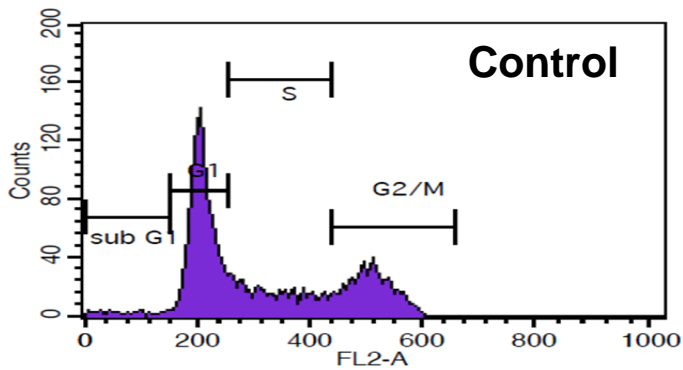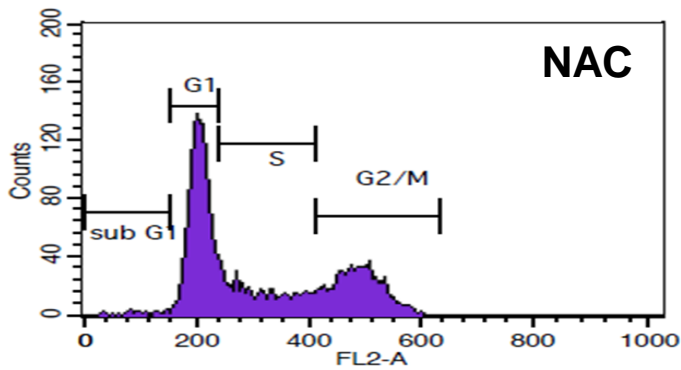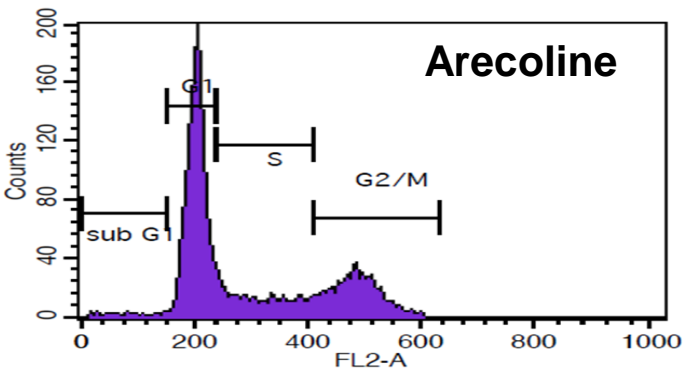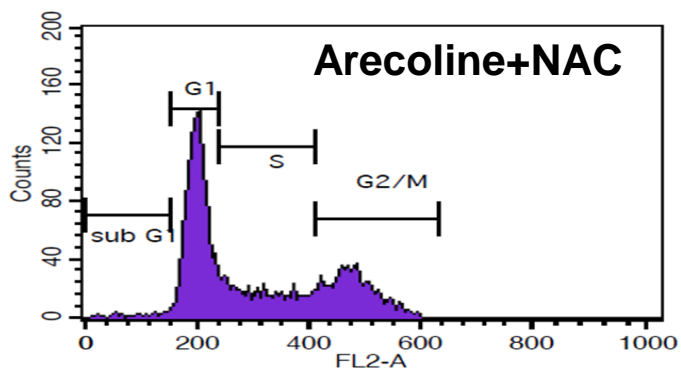

## 48 h

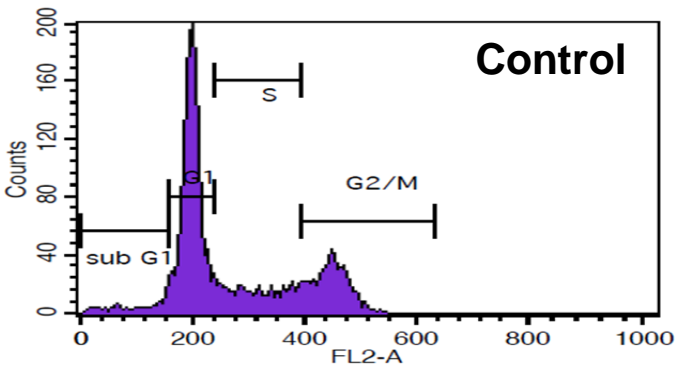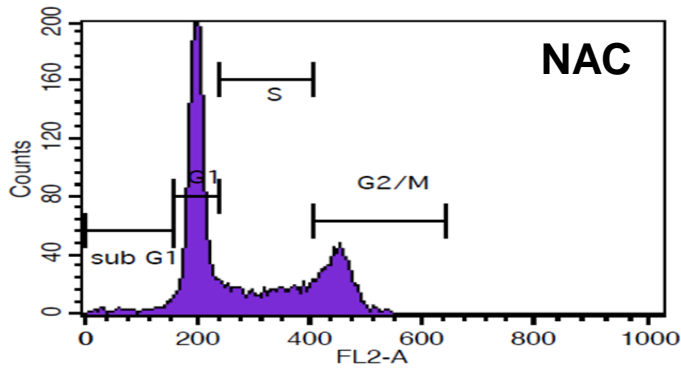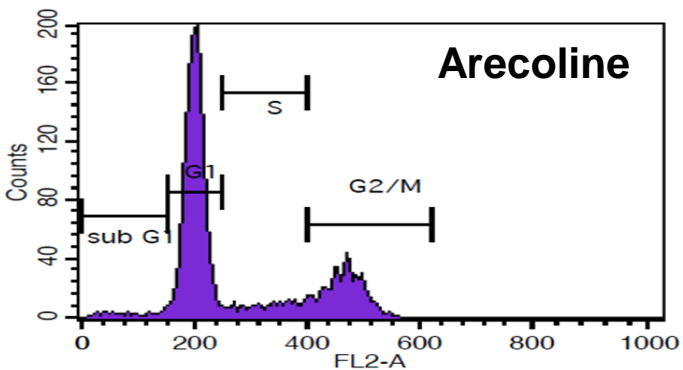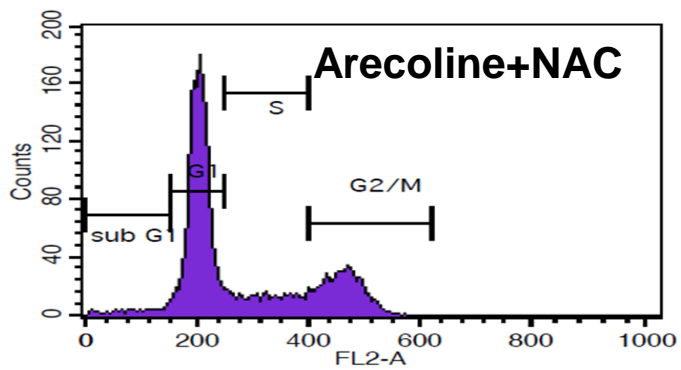

Supplement: ijms-21-09219-s001.pdf [file ijms-21-09219-s001.pdf]
